# Supplementary material
Source: PubMed Central journal article supplement (PMC3163932)
Supplement: 97320630007041S1.pdf [file 97320630007041S1.pdf]

## Supplementary material:

**Table 1:** Algorithms used to predict antagomir targets

| Software used | Purpose                                         |
|---------------|-------------------------------------------------|
| Sfold         | To determine the antagomir sequence             |
| mfold         | Designing the secondary structure of antagomirs |

**Table 2:** List of putative antagomirs and their target sequence

| Seq No. | Target Position | Target Sequence       | Putative Antagomirs    | Binding energy | GC Content |
|---------|-----------------|-----------------------|------------------------|----------------|------------|
| 1       | 27-46           | UCAGGAGGCUCUCAUGUGU   | ACACATTGAGAGCCTCTGA    | -8.7           | 50.0%      |
| 2       | 1-20            | AGGAAGCUUCUGGAGAUCU   | AGGATCTCCAGAAGCTTCCT   | -11.3          | 50.0%      |
| 3       | 35-54           | GAUGUUUACCGUUUAAAUC   | GGATTTAAACCGTAAACATC   | -4.6           | 35.0%      |
| 4       | 35-54           | CCCUUAGAUGCUAAGAUGGG  | CCCATCTTAGCATCTAAGGG   | -8.7           | 50.0%      |
| 5 a     | 34-53           | UGUGAGGUUUUUAGUAACA   | TGTTACTAAAATACCTCACA   | -2.6           | 30.0%      |
| 5 b     | 35-54           | GUGAGGUUUUUAGUAACA    | ATGTTACTAAAATACCTCAC   | -2.6           | 30.0%      |
| 5 c     | 36-55           | UGAGGUUUUUAGUAACAUC   | GATGTTACTAAAATACCTCA   | -2.6           | 30.0%      |
| 5 d     | 37-56           | GAGGUUUUUAGUAACAUCA   | TGATGTTACTAAAATACCTC   | -2.6           | 30.0%      |
| 6 a     | 25-44           | GUCUAGUAUGUCUCAUCCCC  | GGGGATGAGACATACTAGAC   | -8.0           | 50.0%      |
| 6 b     | 33-52           | UGUCUCAUCCCCUACUAGAC  | GTCTAGTAGGGGATGAGACA   | -8.0           | 50.0%      |
| 7       | 79-98           | UGGGUUUGAAUAUCGACAGC  | GCTGTGCGATATTCAAACCCA  | -12.2          | 45.0%      |
| 8 a     | 23-42           | UGGGAUUUGCUUCCUGUCAC  | GTGACAGGAAGCAAATCCCA   | -7.0           | 50.0%      |
| 8 b     | 24-43           | GGGAUUUGCUUCCUGUCACA  | TGTGACAGGAAGCAAATCCC   | -7.0           | 50.0%      |
| 9       | 31-50           | GGUAGCUUUUUGAGAUCUAC  | GTAGATCTCAAAAAGCTACC   | -0.8           | 40.0%      |
| 10 a    | 28-47           | UUGCCUUGUGGCAUGGAGUU  | AACTCCATGCCACAAGGCAA   | -4.4           | 50.0%      |
| 10 b    | 31-50           | CCUUGUGGCAUGGAGUUCAA  | TTGAACTCCATGCCACAAGG   | -4.4           | 50.0%      |
| 10 c    | 32-51           | CUUGUGGCAUGGAGUUCAAG  | CTTGAACTCCATGCCACAAG   | -4.4           | 50.0%      |
| 10 d    | 33-52           | UUGUGGCAUGGAGUUCAAGC  | GCTTGAACTCCATGCCACA    | -4.4           | 50.0%      |
| 10 e    | 33-52           | UGUGGCAUGGAGUUCAAGCA  | TGCTTGAACTCCATGCCACA   | -4.4           | 50.0%      |
| 11 a    | 25-44           | UGGGCCUGGGUUUCUGAACA  | TGTTTCAGAAAACCCAGGCCA  | -8.7           | 50.0%      |
| 11 b    | 27-46           | GGCCUGGGUUUCUGAACA    | TGTGTTTCAGAAAACCCAGGCC | -8.7           | 50.0%      |
| 12      | 29-48           | UCCUCAACAGUAGUCAGG    | CCTGACTGTGAGAGGA       | -6.2           | 50.0%      |
| 13 a    | 50-69           | UAGAUAAACUAAAUCGACAAC | GTTGTGCGATTTAGTTATCTA  | -1.4           | 30.0%      |
| 13 b    | 51-70           | AGAUAAACUAAAUCGACAACA | TGTTGTGCGATTTAGTTATCT  | -1.4           | 30.0%      |
| 13 c    | 52-71           | GAUAAACUAAAUCGACAACAA | TTGTTGTGCGATTTAGTTATC  | -1.4           | 30.0%      |
| 14 a    | 50-69           | GUUGUUGUCUUACUGCGCUC  | GAGCGCAGTAAGACAACAAC   | -9.9           | 50.0%      |
| 14 b    | 53-72           | GUUGUCUUACUGCGCUCAAC  | GTTGAGCGCAGTAAGACAAC   | -9.9           | 50.0%      |
| 14 c    | 56-75           | GUCUUACUGCGCUCAACAAC  | GTTGTTGAGCGCAGTAAGAC   | -9.9           | 50.0%      |
| 15 a    | 48-67           | UGUUGUUCUGAUGUACUACG  | CGTAGTACATCAGAACAACA   | -5.4           | 40.0%      |
| 15 b    | 49-68           | GUUGUUCUGAUGUACUACGA  | TCGTAGTACATCAGAACAAC   | -5.4           | 40.0%      |
| 15 c    | 50-69           | UUGUUCUGAUGUACUACGAC  | GTCGTAGTACATCAGAACA    | -5.4           | 40.0%      |
| 15 d    | 51-70           | UGUUCUGAUGUACUACGACA  | TGTCGTAGTACATCAGAACA   | -5.4           | 40.0%      |
| 15 e    | 52-71           | GUUCUGAUGUACUACGACAA  | TTGTCGTAGTACATCAGAAC   | -5.4           | 40.0%      |
| 15 f    | 53-72           | UUCUGAUGUACUACGACAAC  | GTTGTCGTAGTACATCAGAA   | -5.4           | 40.0%      |
| 15 g    | 54-73           | UCUGAUGUACUACGACAACA  | TGTTGTCGTAGTACATCAGA   | -5.4           | 40.0%      |
| 16      | 91-110          | UGACAUAAACACUCCGCUCU  | AGAGCGGAGTGTATTATGTCA  | -11.5          | 45.0%      |
| 17 a    | 46-65           | UGUGUGGUAUCCGUUAUGUC  | GACTATACGGATACCCACACA  | -6.8           | 45.0%      |
| 17 b    | 47-66           | GUGUGGUAUCCGUUAUGUCA  | TGACTATACGGATACCCACAC  | -6.8           | 45.0%      |
| 17 c    | 48-67           | UGUGGUAUCCGUUAUGUCAC  | GTGACTATACGGATACCCACA  | -6.8           | 45.0%      |
| 17 d    | 49-68           | GUGGUAUCCGUUAUGUCACA  | TGTGACTATACGGATACCCAC  | -6.8           | 45.0%      |
| 17 e    | 50-69           | UGGUAUCCGUUAUGUCACAG  | CTGTGACTATACGGATACCA   | -6.8           | 45.0%      |
| 18      | 44-63           | UGUGAGCAAUAGUAAGGAAG  | CTTCCTTACTATTGCTCACA   | -10.3          | 40.0%      |
| 19      | 55-74           | GGUGAGUUUGGGAUUUGAAA  | TTCAAATCCCAAACCTCACC   | -10.1          | 40.0%      |
| 20 a    | 54-73           | UGGGUUGAACUGUGUGGACA  | TGTCCACACAGTTCAACCCA   | -6.8           | 50.0%      |
| 20 b    | 55-74           | GGGUUGAACUGUGUGGACAA  | TTGTCCACACAGTTCAACCC   | -6.8           | 50.0%      |
| 20 c    | 56-75           | GGUUGAACUGUGUGGACAAG  | CTTGTCCACACAGTTCAACC   | -6.8           | 50.0%      |
| 20 d    | 57-76           | GUUGAACUGUGUGGACAAGC  | GTTGTCCACACAGTTCAAC    | -6.8           | 50.0%      |
| 20 e    | 59-78           | UGAACUGUGUGGACAAGCUC  | GAGCTTGTCCACACAGTTCA   | -6.8           | 50.0%      |
| 21      | 48-67           | UUUGGGCAGCUCAGGCAAC   | GTTTGCTGAGCTGCCAAA     | -8.4           | 55.0%      |
| 22 a    | 43-62           | CACUGGUGAGGUAACAGGAU  | ATCCTGTTACCTCACCAGTG   | -12.9          | 50.0%      |
| 22 b    | 44-63           | ACUGGUGAGGUAACAGGAUC  | GATCCTGTTACCTCACCAGT   | -12.9          | 50.0%      |
